# Supplementary material for: Interprofessional Differences in Disposition Decisions: Results From a Standardized Web-Based Patient Assessment
Source: Atypon-hosted journal article supplement (doi:10.1176/appi.ps.201200461), 2013-08-01
Supplement: 808_ds001.pdf [file 808_ds001.pdf]

## Supplementary Document 1: Simulation Action List and Action Timing Comparison

The table below describes a series of possible learner actions (probes and proposed interventions) and what information the SP reveals in response to each probe. It also provides a comparison of what actions physicians chose compared to non-physicians, and when in the sequence of actions each one was chosen. For example, physicians chose the action “psychosis” significantly earlier than non-physicians in the simulation.

| Simulation Content |                           |                                                                                                           | Mean order of Physician vs. Non-physician Actions |               |        |         |    |
|--------------------|---------------------------|-----------------------------------------------------------------------------------------------------------|---------------------------------------------------|---------------|--------|---------|----|
| Line of Inquiry    | Learner Action/ Probe     | Information Revealed                                                                                      | Physician                                         | Non-Physician | F      | p value |    |
| Assess Symptoms    | Anxiety                   | Pt feels very anxious, onset during past few weeks                                                        | 5.06                                              | 4.68          | .077   | .781    |    |
|                    | Hopelessness              | Pt feels hopeless                                                                                         | 5.8                                               | 5.37          | 4.528  | .034    |    |
|                    | Homicidal ideation/intent | Pt is angry at ex-wife, thoughts of hurting her but no plan                                               | 4.44                                              | 4.49          | 10.895 | .001    | ** |
|                    | Irritability              | Pt feels irritable                                                                                        | 7.1                                               | 8.58          | 1.117  | .291    |    |
|                    | Mania                     | Pt is not experiencing manic symptoms                                                                     | 9.03                                              | 9.12          | 1.471  | .226    |    |
|                    | Neurovegetative symptoms  | Pt is experiencing anhedonia, low concentration, early morning awakening                                  | 8.13                                              | 9.23          | .004   | .951    |    |
|                    | Psychosis                 | Pt experienced auditory hallucinations during deployment but no longer                                    | 7.52                                              | 10.2          | 14.311 | .000    | ** |
|                    | Pain                      | Pt is experiencing joint pain                                                                             | 11.71                                             | 10.96         | .019   | .891    |    |
|                    | Sadness                   | Pt does not endorse sadness                                                                               | 9.29                                              | 9.6           | .851   | .357    |    |
|                    | Suicidal ideation/intent  | Pt is having thoughts of suicide, has a plan and the means to carry out this plan. Does not plan to do so | 4.85                                              | 5.39          | 4.507  | .034    | *  |

|                    |                         |                                                                                                                              |       |       |       |      |   |
|--------------------|-------------------------|------------------------------------------------------------------------------------------------------------------------------|-------|-------|-------|------|---|
|                    |                         | “today”                                                                                                                      |       |       |       |      |   |
|                    | Substance use           | Pt drinks 4-5 days/week, <5 beers/night                                                                                      | 7.55  | 7.83  | .085  | .771 |   |
| Assess History     | Family history          | Pt brother was depressed, committed suicide                                                                                  | 13.51 | 12.94 | 3.866 | .05  | * |
|                    | Legal history           | Pt doesn't “get caught”, describes speeding                                                                                  | 13.14 | 14.66 | 3.881 | .05  | * |
|                    | Medical history         | Possible mild TBI during high school football                                                                                | 14.47 | 14.06 | 1.401 | .237 |   |
|                    | Psychiatric history     | Previous episode of depression in 30s, untreated                                                                             | 10.77 | 9.75  | 8.002 | .005 | * |
|                    | Suicide attempts        | Pt has never attempted suicide                                                                                               | 10.19 | 9.19  | 3.108 | .079 |   |
|                    | Trauma history          |                                                                                                                              | 13.65 | 12.15 | 1.485 | .224 |   |
| Assess Environment | Access to firearms      | Pt has firearm in garage, no bullets                                                                                         | 12.60 | 10.68 | 3.097 | .224 |   |
|                    | Current employment      | Pt is currently employed but is having difficulties at work; was called in last week to discuss low productivity             | 16.96 | 15.72 | 3.788 | .053 |   |
|                    | Current relationships   | Recently divorced, ex-wife is dating friend. Pt is concerned that she cheated on him                                         | 15.86 | 14.49 | 7.658 | .006 | * |
|                    | Religious beliefs       | Pt identifies as Catholic, does not practice regularly                                                                       | 17.97 | 16.26 | .001  | .976 |   |
|                    | Review hobbies          | Pt plays poker and golf                                                                                                      | 23.05 | 20.56 | 4.046 | .05  | * |
|                    | Review childhood        | Pt grew up with brother, three sisters, and mother. Father was in the Navy and absent, mother was nurse. Enjoyed high school | 21.24 | 20.43 | .086  | .77  |   |
|                    | Self-identified support | Pt identifies buddies as support                                                                                             | 15.86 | 14.92 | .107  | .744 |   |

|                                    |                                         |                                                                                                                                                                 |       |       |       |      |  |
|------------------------------------|-----------------------------------------|-----------------------------------------------------------------------------------------------------------------------------------------------------------------|-------|-------|-------|------|--|
| Discuss Next Steps                 | Discuss willingness for hospitalization | Pt reacts negatively                                                                                                                                            | 19.44 | 19.27 | .201  | .654 |  |
|                                    | Contract for safety                     | Pt agrees to sign contract indicating that he will not act on any urges to hurt himself, and that he will call clinician or 911 if he is having unsafe thoughts | 19.80 | 18.14 | .303  | .583 |  |
|                                    | Discuss willingness to secure firearm   | Pt agrees to lock gun and store it outside of house                                                                                                             | 19.56 | 18.90 | .201  | .654 |  |
| Interventions                      | Refer for couples therapy               | Clinician offers referral to couples therapy for pt and ex-wife. Pt reacts negatively                                                                           | 21.60 | 22.00 | 1.065 | .324 |  |
|                                    | Refer to psychiatry specialty clinic    | Clinician offers referral to psychiatry clinic for tx for depression. Pt agrees                                                                                 | 21.60 | 20.65 | .004  | .953 |  |
|                                    | Call security                           | Clinician informs pt that he is safety risk and that he is calling security, pt becomes angry                                                                   | 20.34 | 19.92 | .185  | .669 |  |
|                                    | Escort to emergency department          | Clinician informs pt that he is safety risk and must go to ER, pt becomes angry                                                                                 | 21.3  | 20.29 | 1.879 | .172 |  |
| Note: * $p < 0.05$ , ** $p < 0.01$ |                                         |                                                                                                                                                                 |       |       |       |      |  |
